# Supplementary material
Source: HighWire-hosted journal article supplement (http://d2538ggaoe6cji.cloudfront.net/highwire/filestream/61084/field_highwire_adjunct_files/0/150474-1.pdf)
Supplement: 150474-1.pdf [file 150474-1.pdf]

# Supplementary Information

Impact of domain knowledge on predictions of binding energies by alchemical free energy calculations

A. S.J.S. Mey, J. Juárez-Jiménez, J. Michel

September 29, 2017

## Contents

|   |                                                               |    |
|---|---------------------------------------------------------------|----|
| 1 | Datasets                                                      | 2  |
| 2 | Details of Alchemical free energy protocols for Set1 and Set2 | 2  |
| 3 | Perturbation networks                                         | 4  |
| 4 | Scaling for LitSet1 and LitSet2                               | 8  |
| 5 | Comparison to other Protocols                                 | 10 |
| 6 | Complete ligand library                                       | 11 |

# 1 Datasets

The chemical structure of compounds used for relative free energy calculations can be found in figure 1 and figure 2. The four different data sets, LitSet 1, LitSet 2, and D3R grand challenge set 1 and 2 are shown.

## LitSet 1

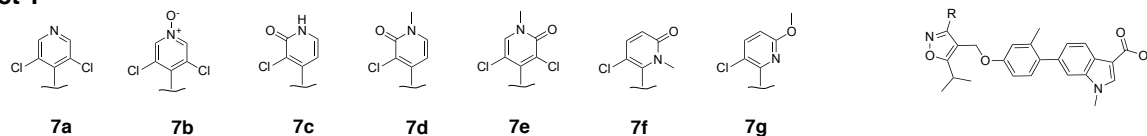

## LitSet 2

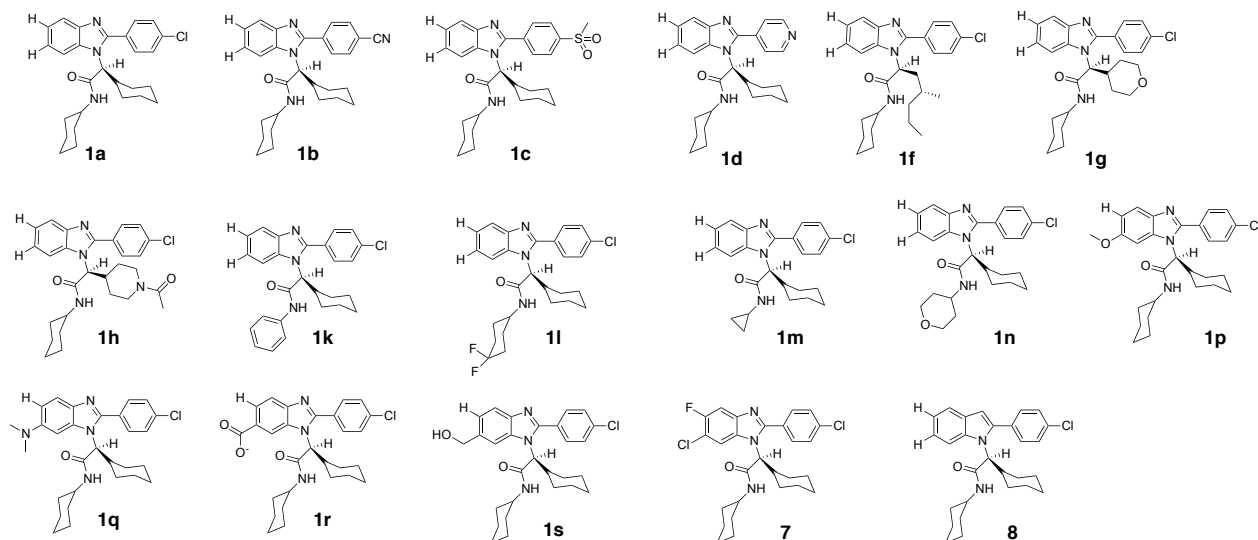

Figure 1: Compounds of the literature data sets used for the computations

## Set 1

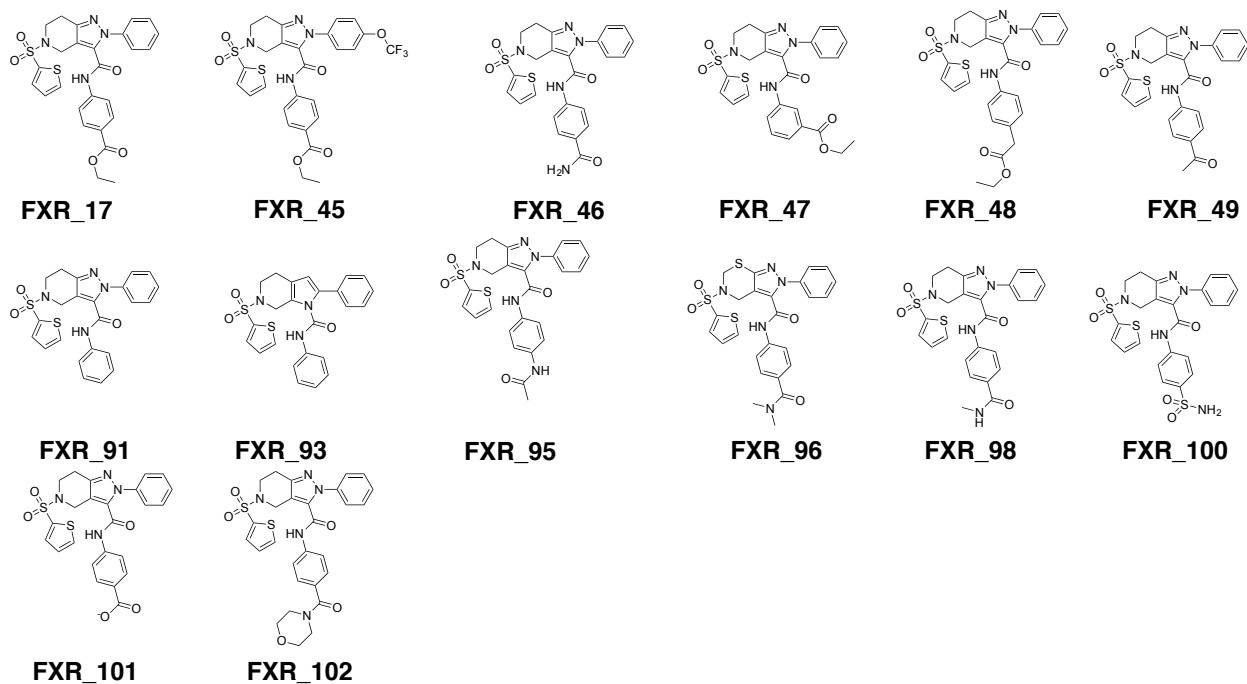

## Set 2

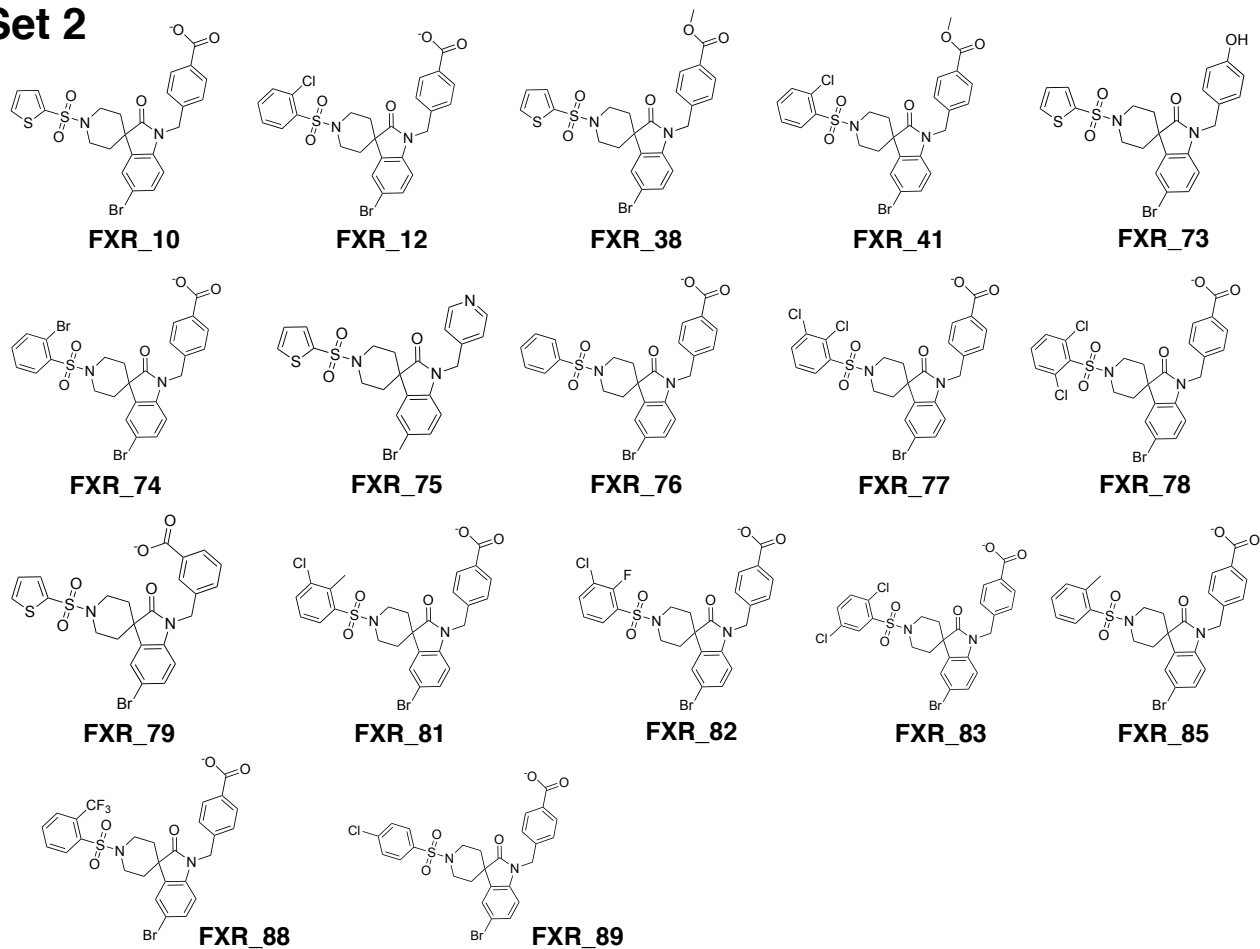

Figure 2: D3R grand challenge datasets set1 and set2

Table 1: Summary of perturbation  $\lambda$  windows for run1 and run2 of Set1 stage2, if perturbation not listed, then 17 windows were used.

| Number of $\lambda$ windows |                 |
|-----------------------------|-----------------|
| 9                           | 26              |
| FXR99~FXR91                 | FXR95~FXR48     |
| FXR49~FXR46                 | FXR101~FXR91    |
| FXR46~FXR49                 | FXR91~INT02_BM2 |
| FXR98~FXR46                 | FXR96~FXR91     |
| FXR49~INT01                 | INT01~FXR102    |
| INT01~FXR49                 | FXR102~INT01    |
|                             | FXR91~FXR96     |
|                             | INT02_BM2~FXR91 |

## 2 Details of Alchemical free energy protocols for Set1 and Set2

For set1 all perturbations were run twice. The following perturbations were additionally run, using the same number of windows as before and using a forwards and backwards perturbation: **49-91**, **102-INT01**, **INT02\_BM2**, **91**, **96-98** and **100-98**. For set2 data 68 of the perturbations were run using 9 windows, 22 using 17 windows and 18 using 26 windows and a summary can be found in file: `jobtype.set2.stage2.dat`, all perturbations were run twice and perturbation with irregularities were run 3 times. These additional runs were, both in forwards and backwards direction: **10\_BM1-Int01\_BM1**, **76-77\_BM2**, **83\_BM2**, **82\_BM2** and **79\_BM1B-Int01\_BM1**. All relevant input files for repeating calculations and analysis can be found on github: [https://github.com/michellab/D3R\\_GC2\\_Data](https://github.com/michellab/D3R_GC2_Data).

### 3 Perturbation networks

The perturbation network of LitSet1 and LitSet2 can be found in figure 3 and figure 4.

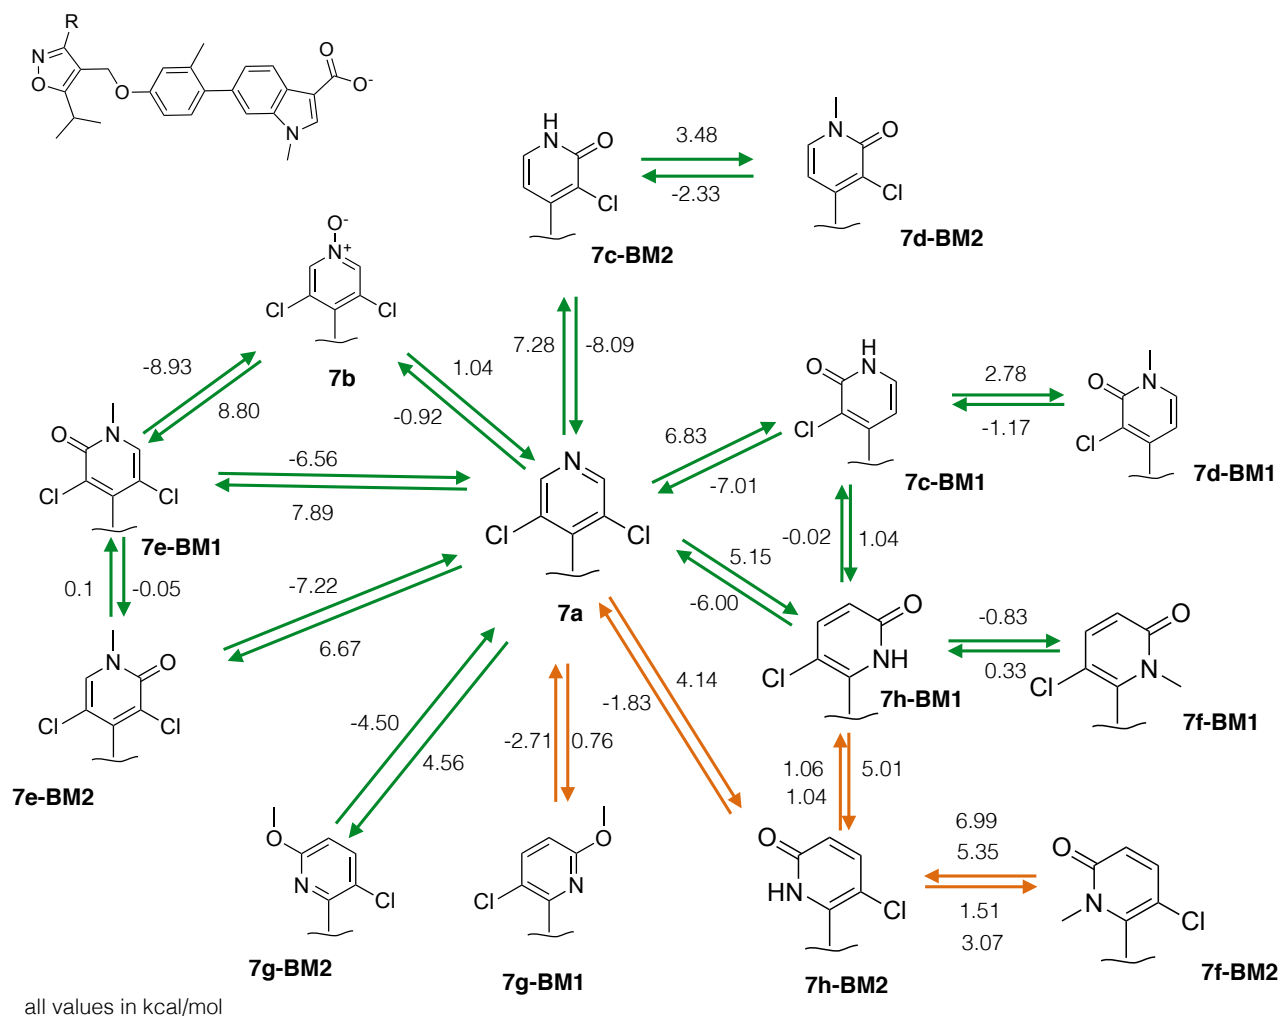

Figure 3: Perturbation map for LitSet1

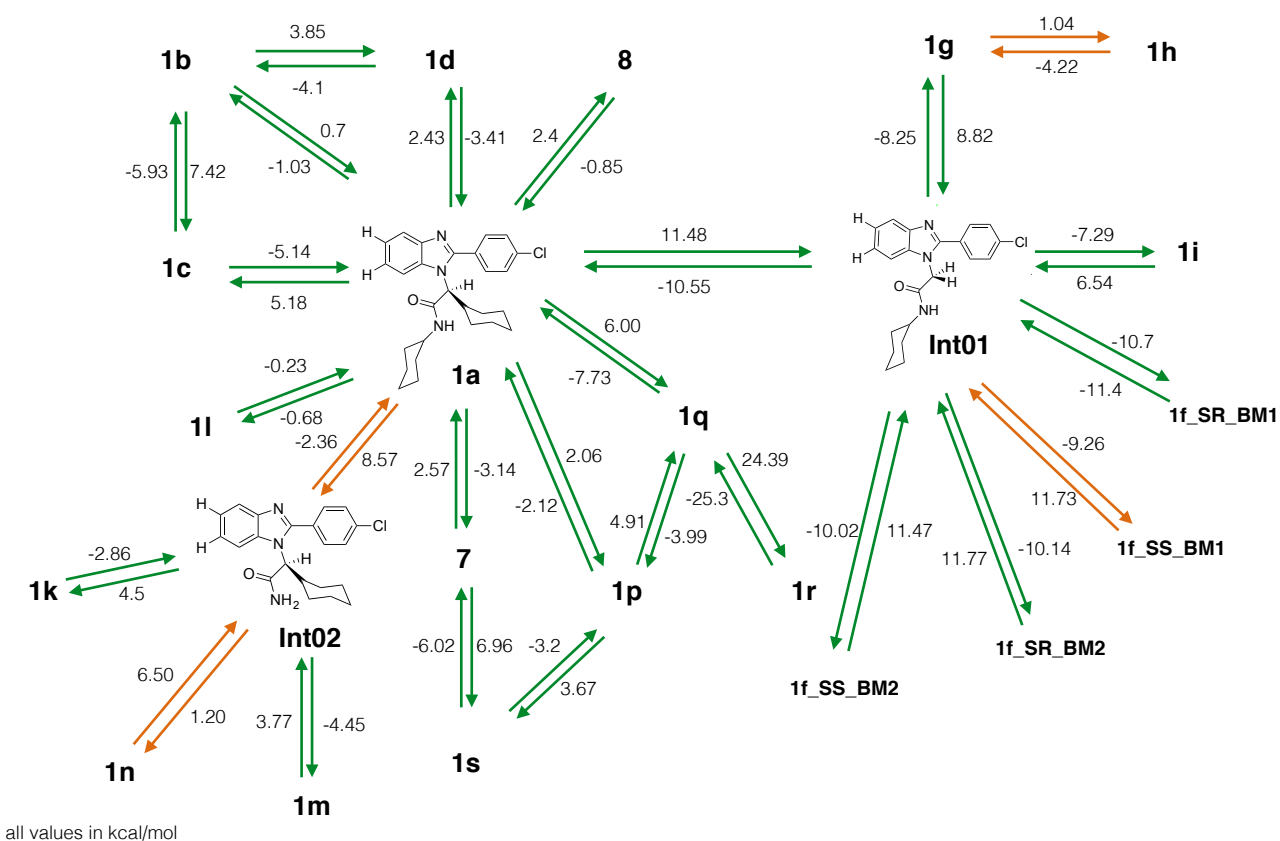

Figure 4: Perturbation map for LitSet2

The perturbation network of set1 and set2 of the D3R grand challenge 2 can be found in figure 5, figure 6, and figure 6.

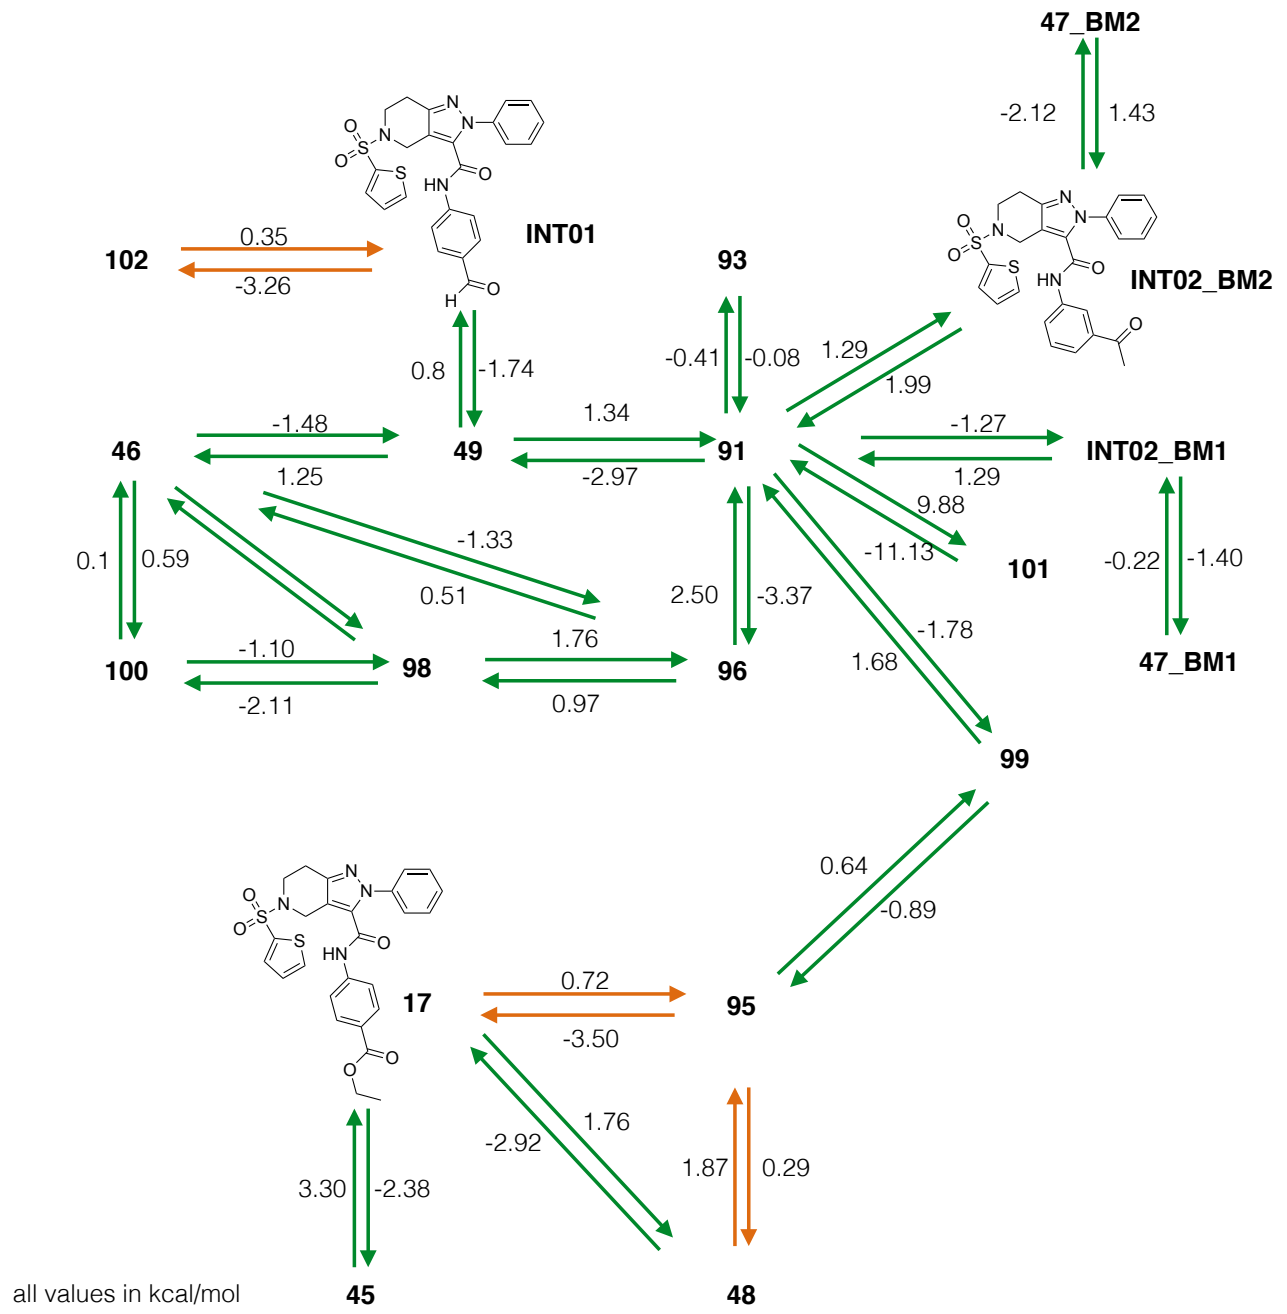

Figure 5: Perturbation map for set1 of the D3R grand challenge

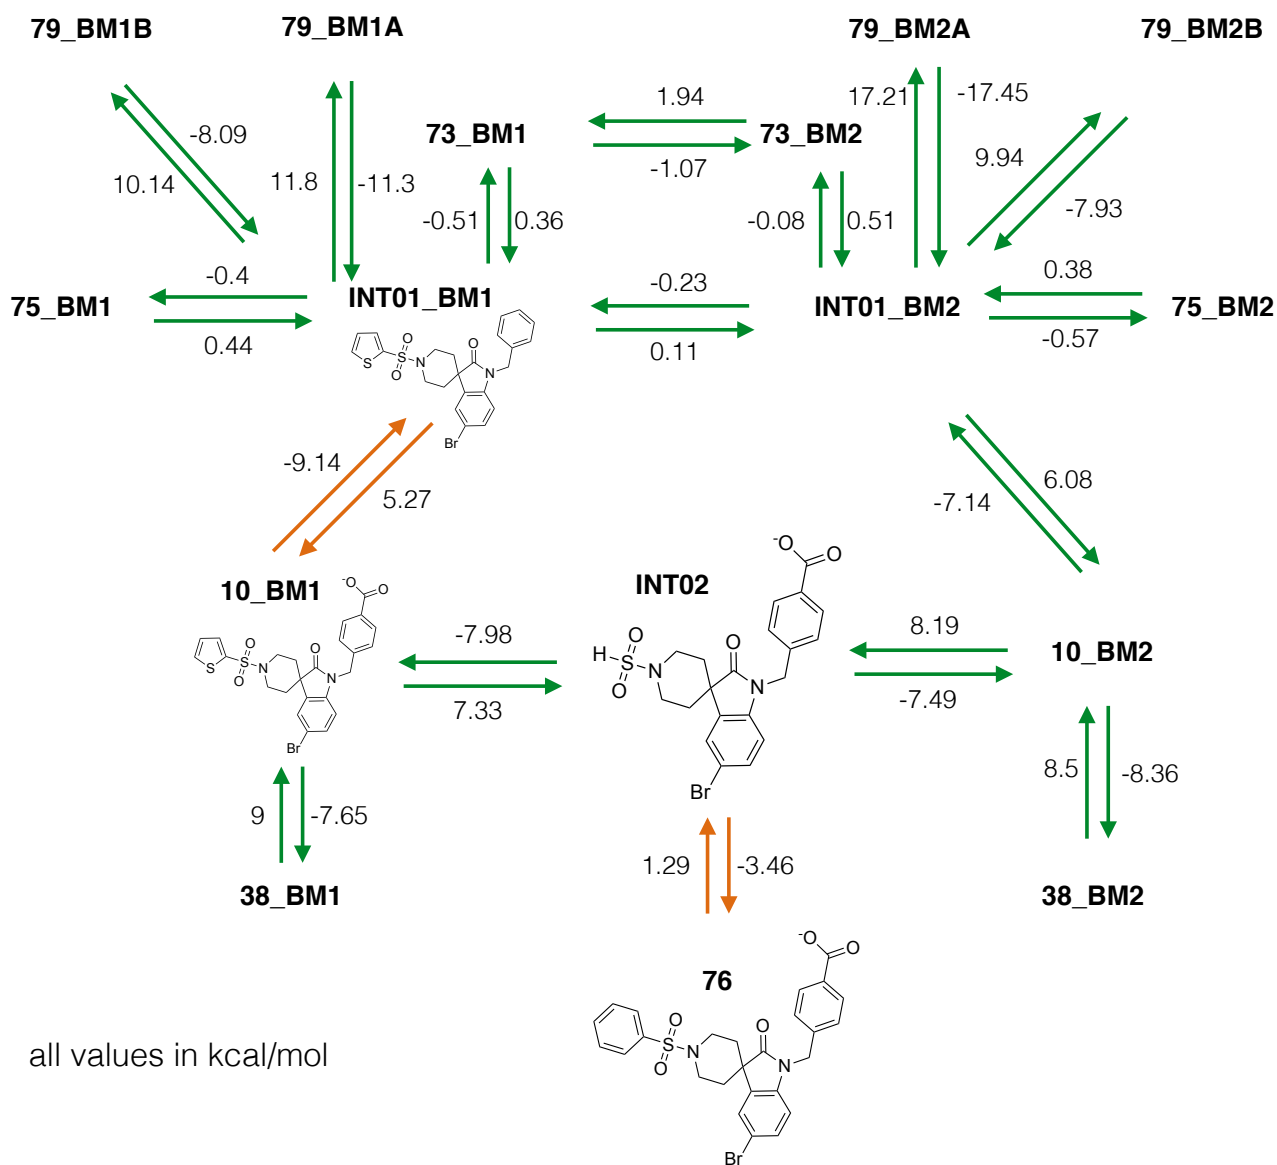

all values in kcal/mol

Figure 6: First part of the perturbation network for set2 of the D3R grand challenge

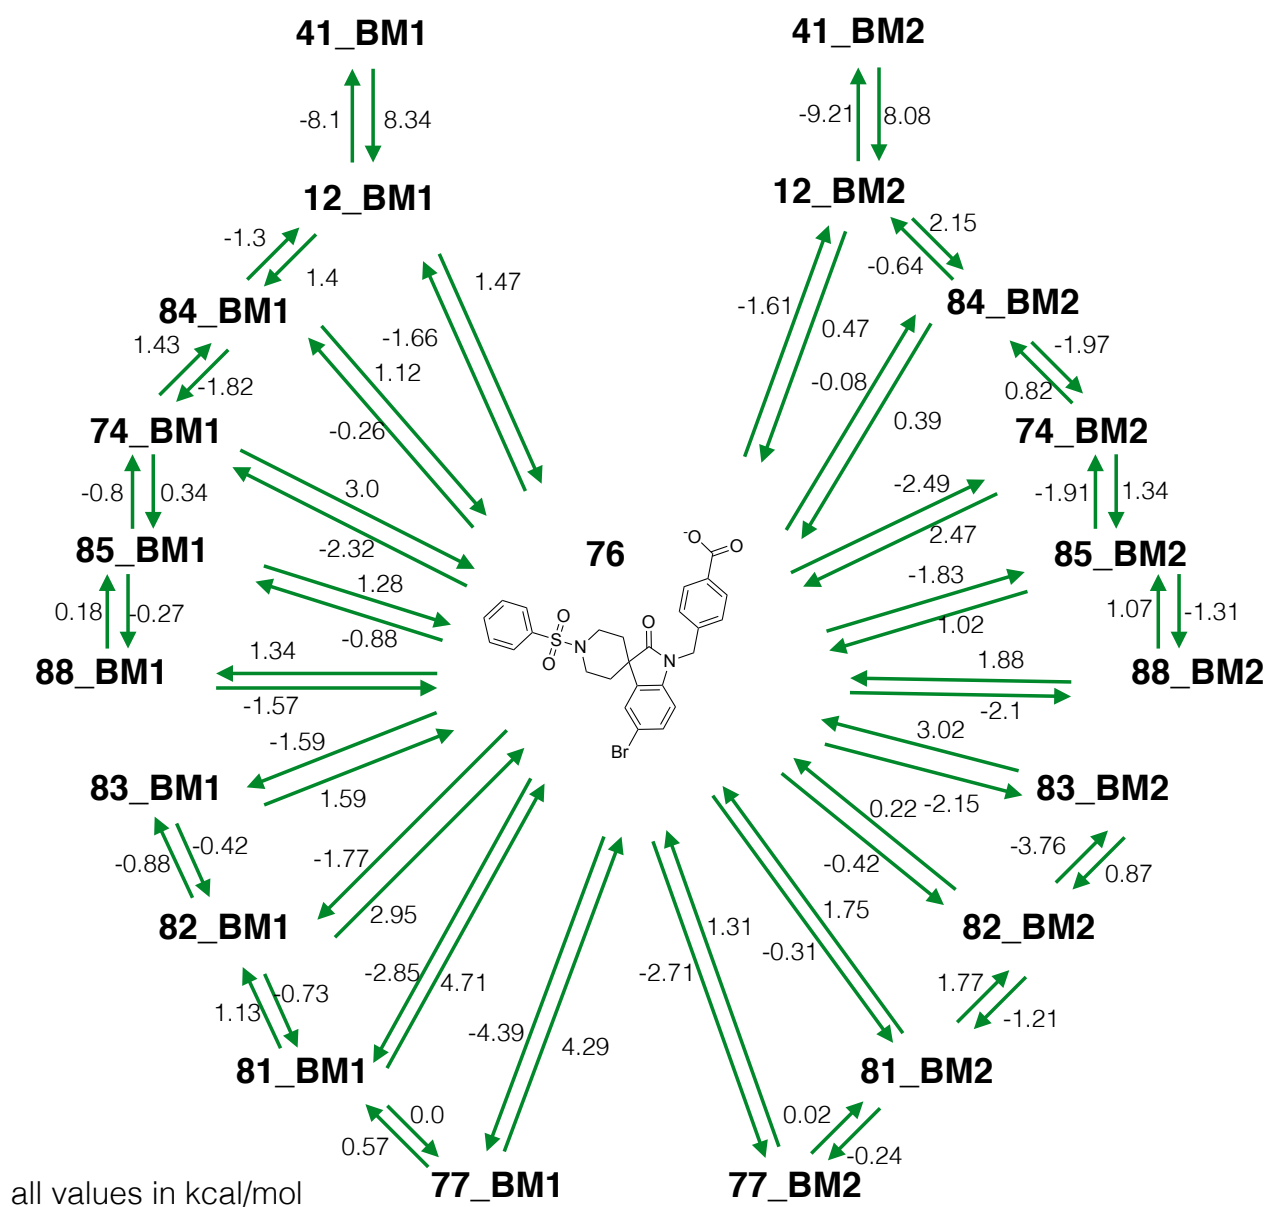

Figure 7: Second part of the perturbation network for set2 of the D3R grand challenge

## 4 Scaling for LitSet1 and LitSet2

Figure 3 and figure 4, show the scaling (1 - 0.5 and experimental values) of the estimated free energies (A) and the resulting Pearson correlation coefficient (B) for LitSet1 and LitSet2 respectively.

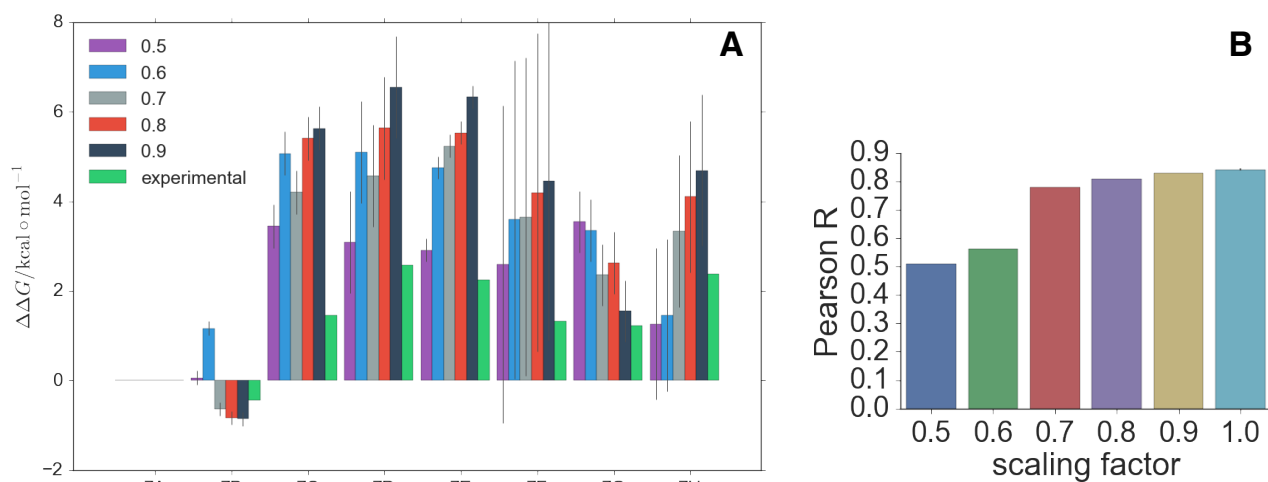

Figure 8: A: Scaling of estimated free energies for LitSet1 compounds, B: resulting correlation for scaling

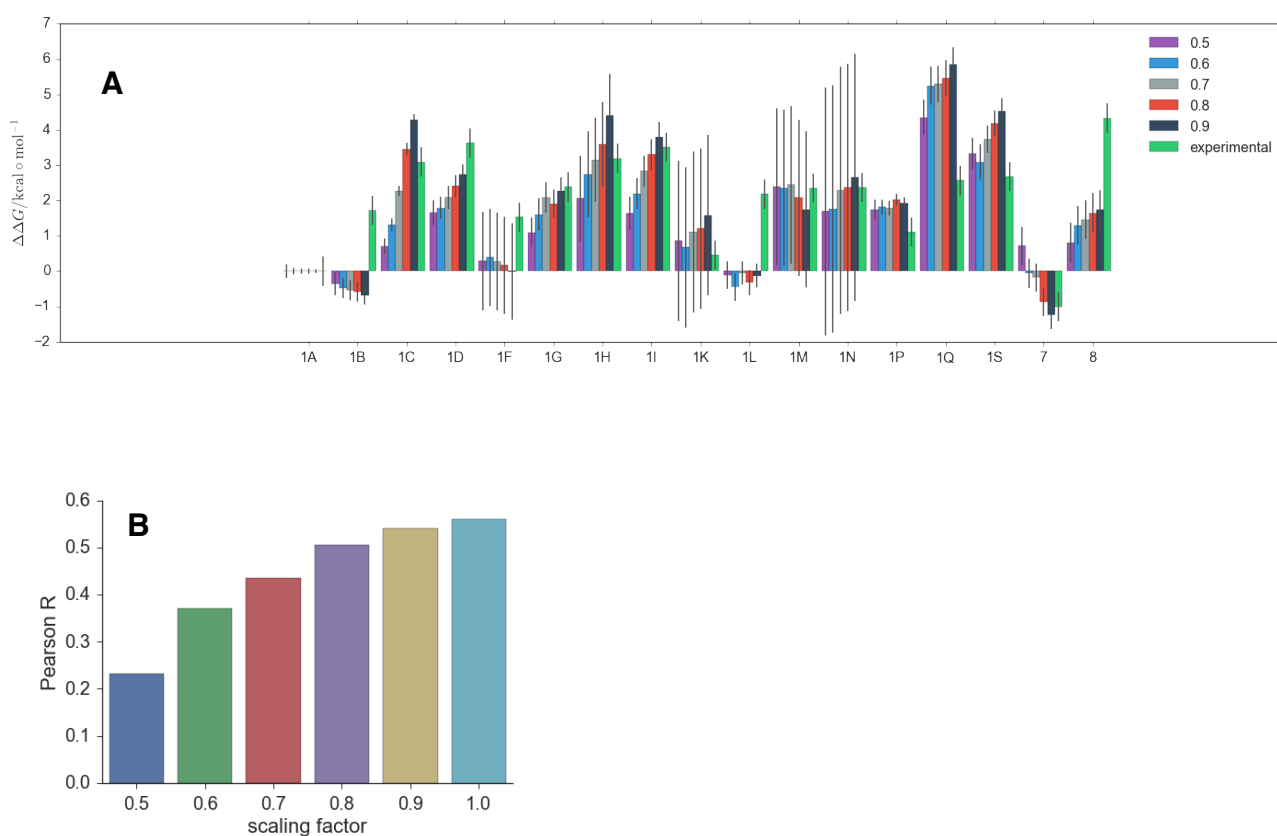

Figure 9: A: Scaling of estimated free energies for LitSet2 compounds, B: resulting correlation for scaling

## 5 Comparison to other Protocols

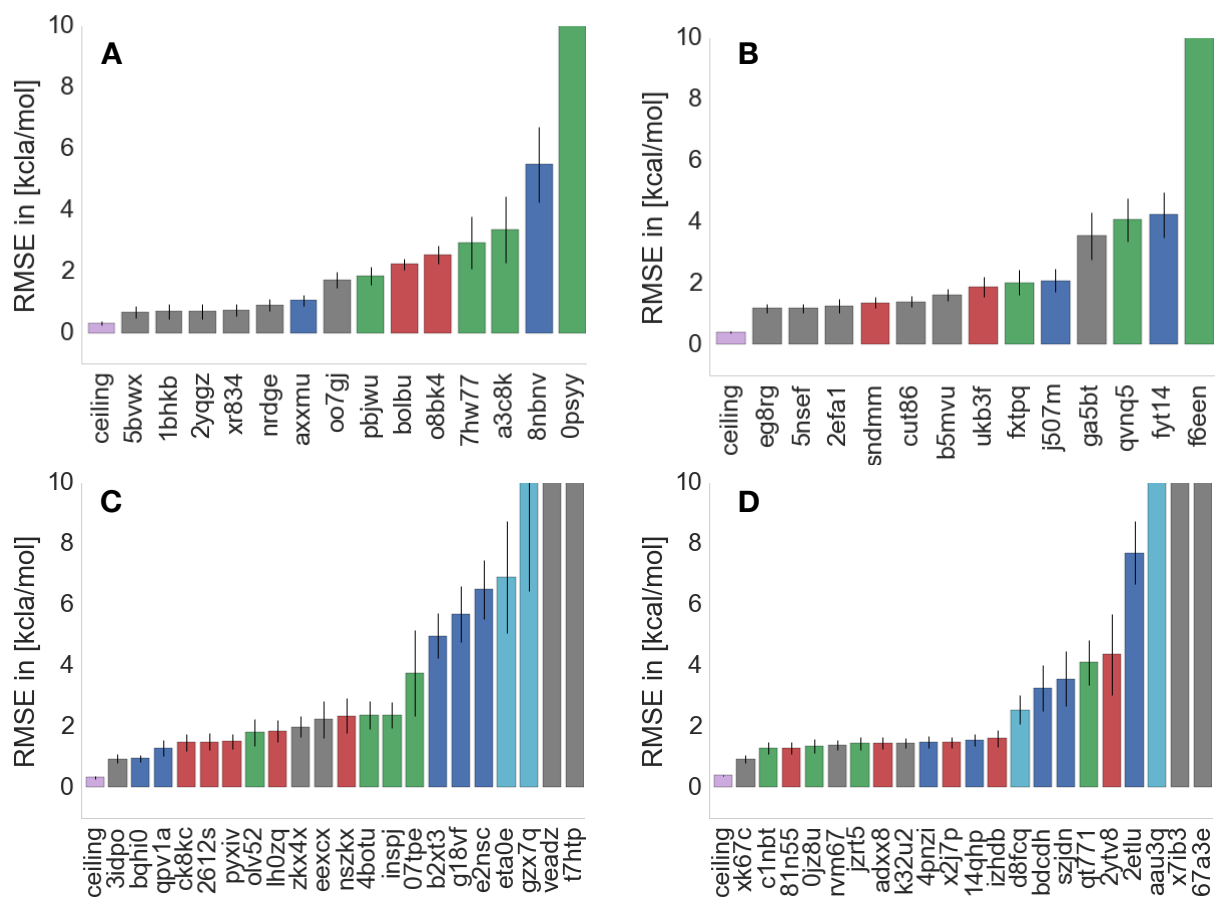

Figure 10: A: set1 stage 1, B: set2 stage 1, C: set1 stage 2, D: set2 stage 2. RMSD deviation of all submission protocols.

## 6 Complete ligand library

Figure 6 shows all 2D structures of the 102 inhibitors in the dataset provided.

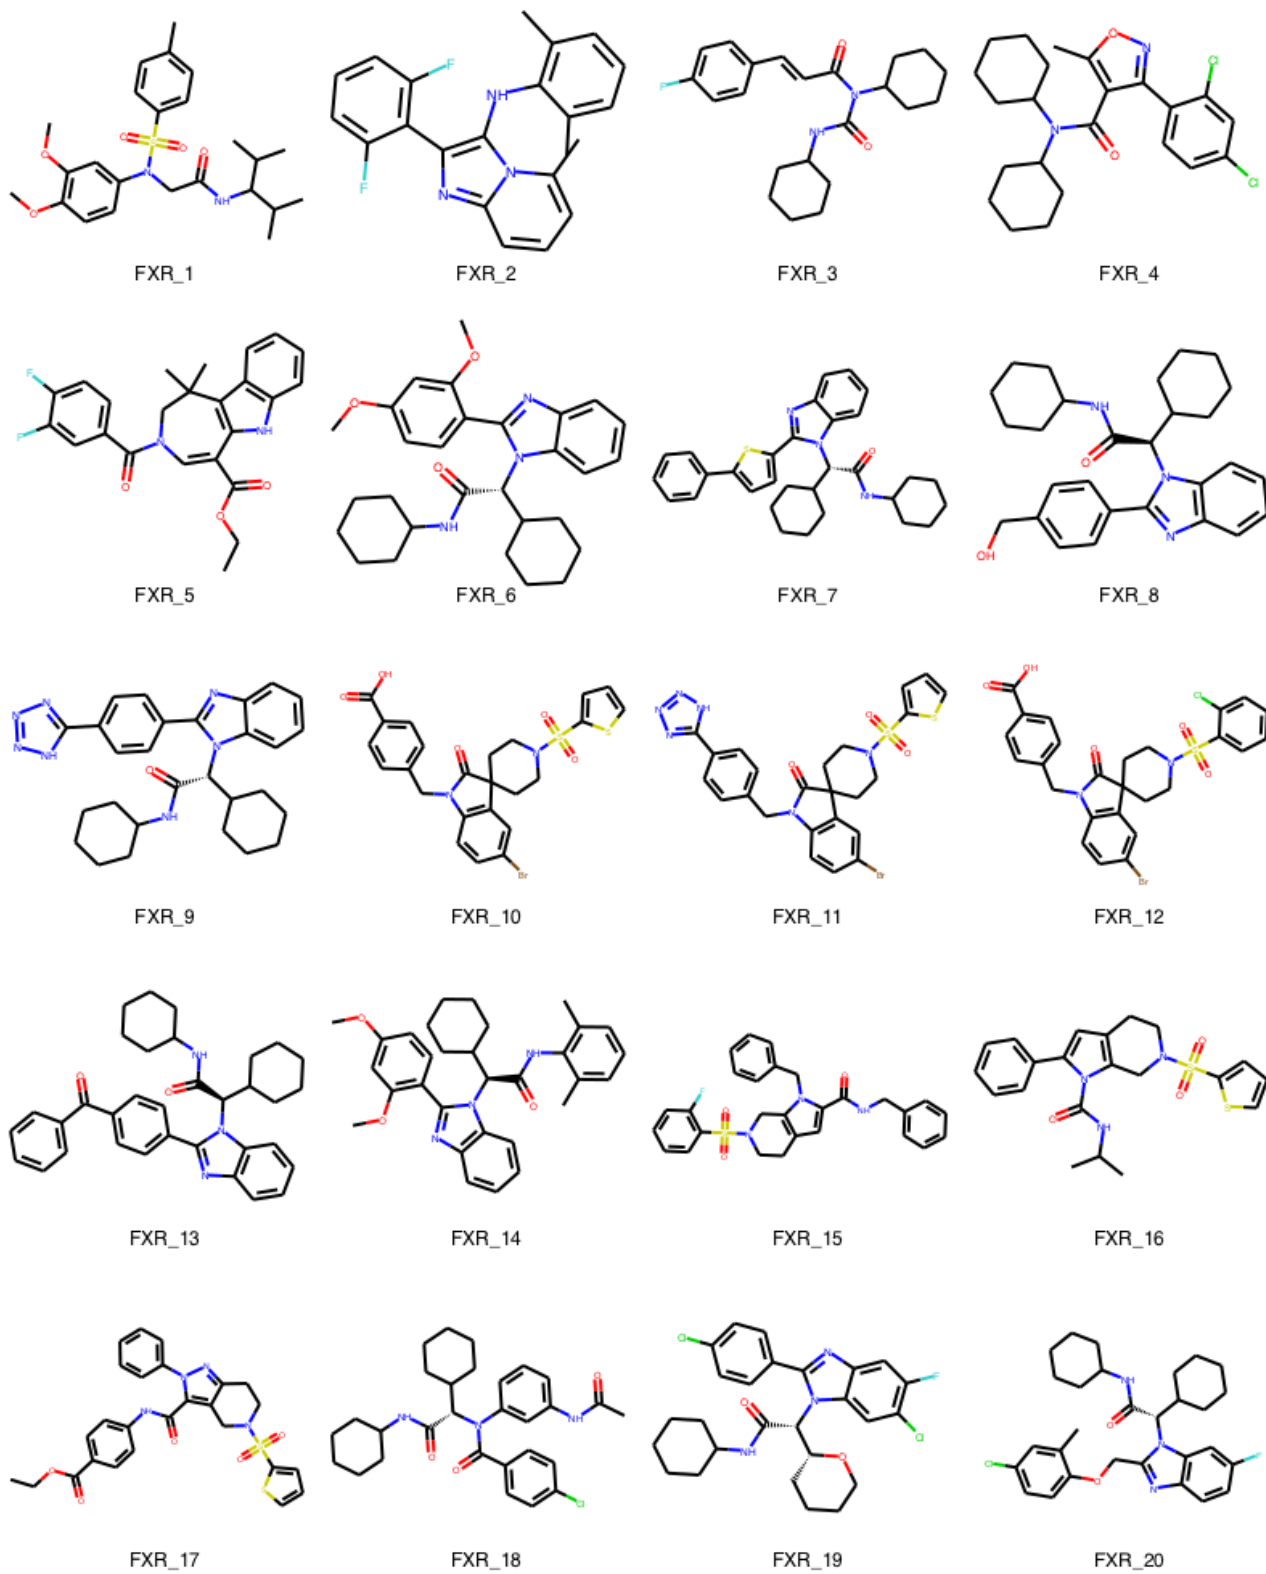

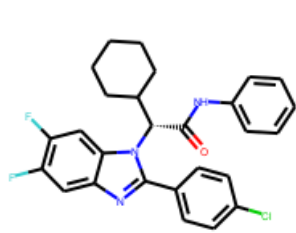

FXR\_21

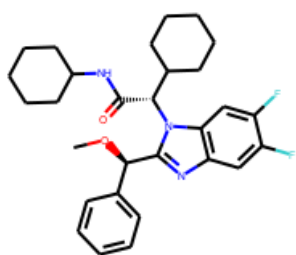

FXR\_22

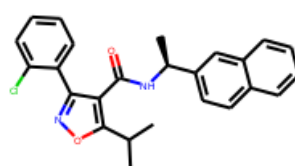

FXR\_23

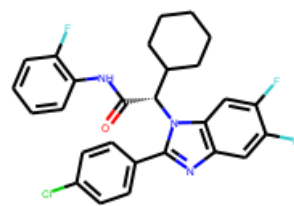

FXR\_24

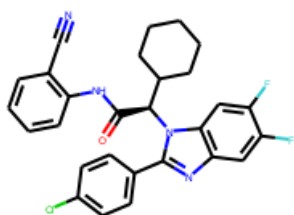

FXR\_25

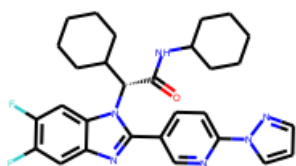

FXR\_26

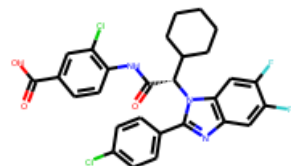

FXR\_27

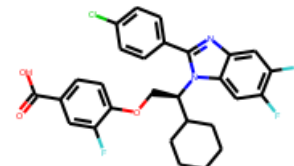

FXR\_28

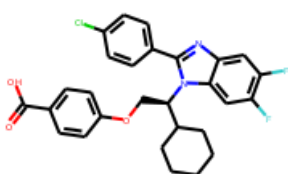

FXR\_29

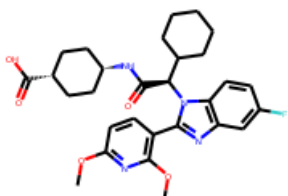

FXR\_30

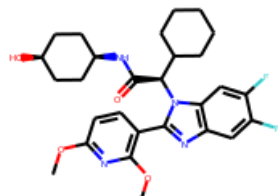

FXR\_31

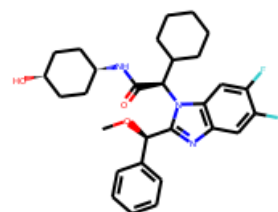

FXR\_32

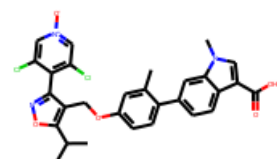

FXR\_33

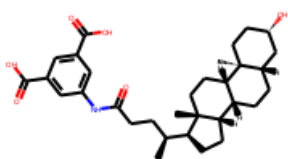

FXR\_34

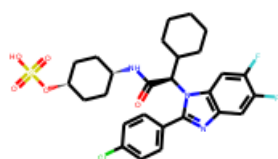

FXR\_35

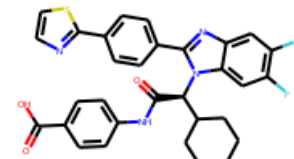

FXR\_36

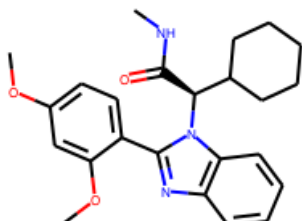

FXR\_37

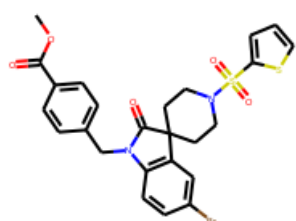

FXR\_38

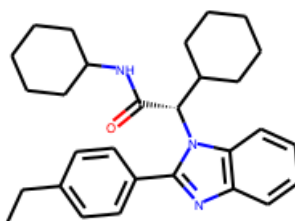

FXR\_39

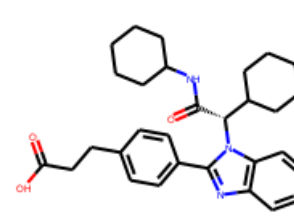

FXR\_40

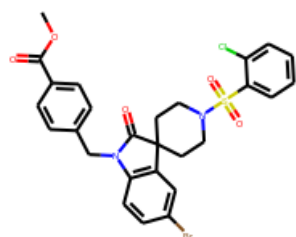

FXR\_41

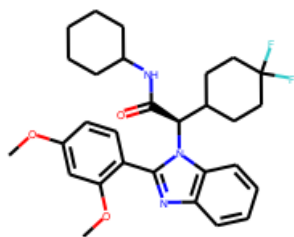

FXR\_42

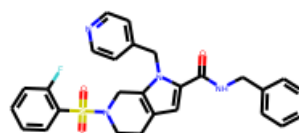

FXR\_43

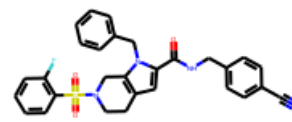

FXR\_44

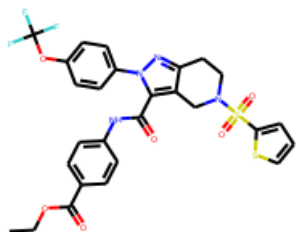

FXR\_45

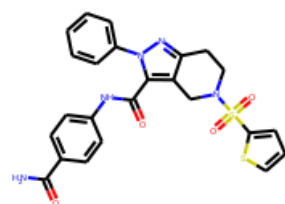

FXR\_46

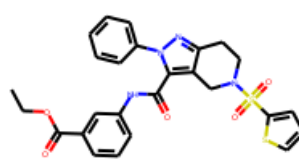

FXR\_47

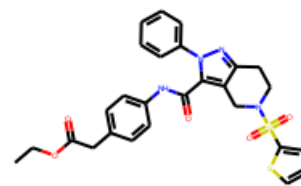

FXR\_48

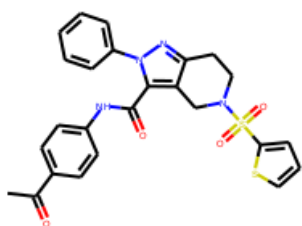

FXR\_49

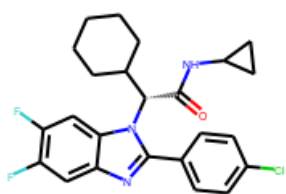

FXR\_50

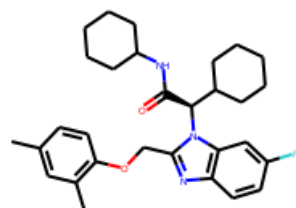

FXR\_51

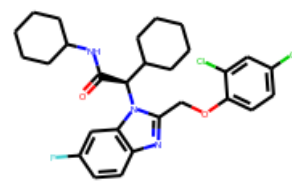

FXR\_52

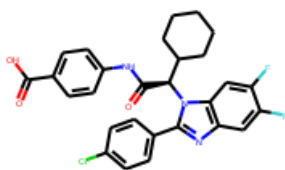

FXR\_53

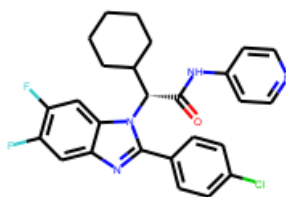

FXR\_54

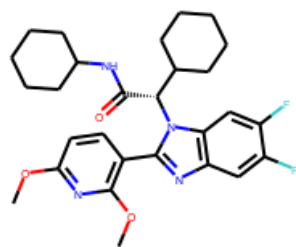

FXR\_55

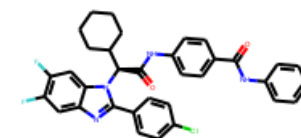

FXR\_56

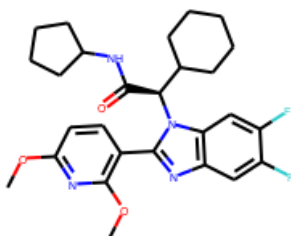

FXR\_57

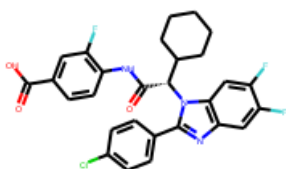

FXR\_58

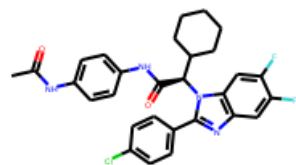

FXR\_59

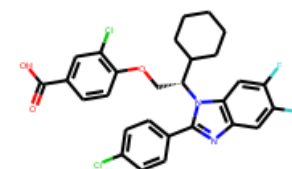

FXR\_60

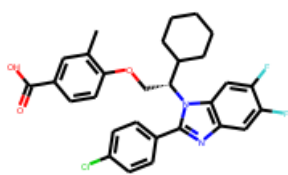

FXR\_61

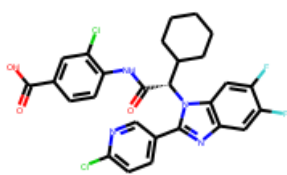

FXR\_62

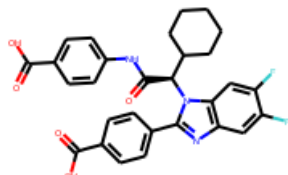

FXR\_63

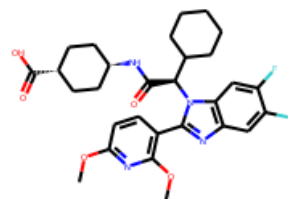

FXR\_64

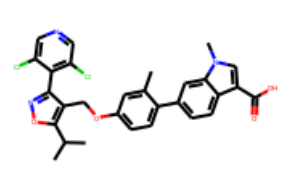

FXR\_65

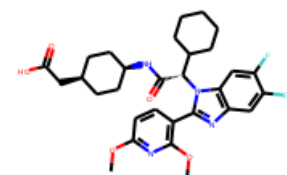

FXR\_66

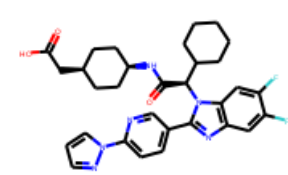

FXR\_67

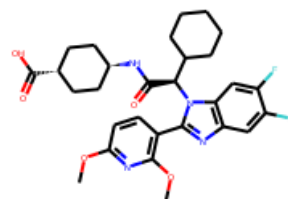

FXR\_68

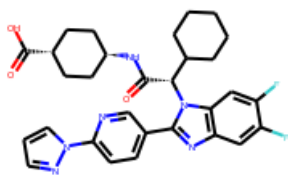

FXR\_69

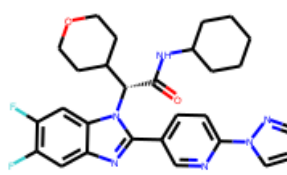

FXR\_70

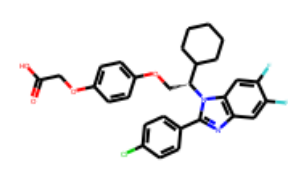

FXR\_71

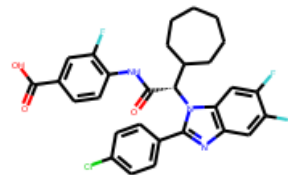

FXR\_72

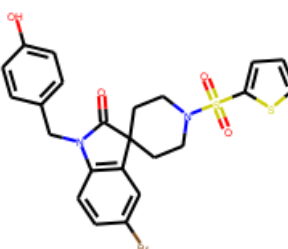

FXR\_73

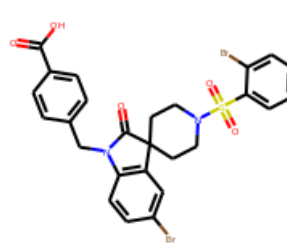

FXR\_74

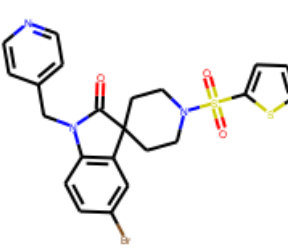

FXR\_75

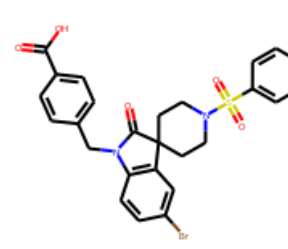

FXR\_76

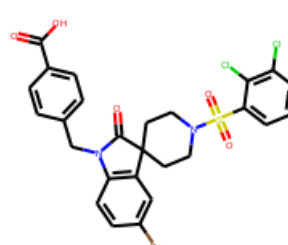

FXR\_77

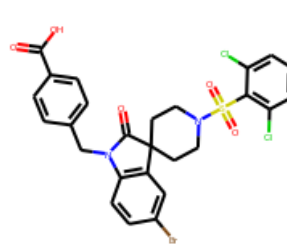

FXR\_78

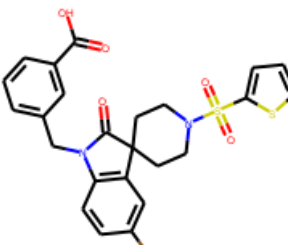

FXR\_79

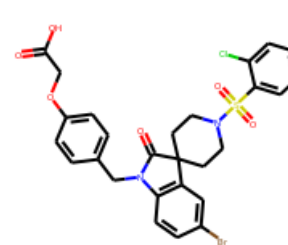

FXR\_80

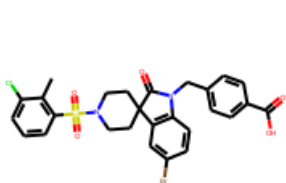

FXR\_81

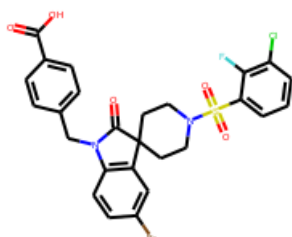

FXR\_82

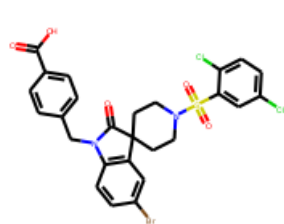

FXR\_83

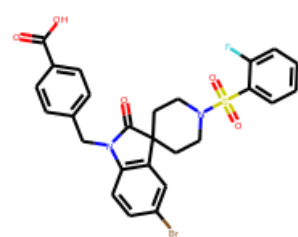

FXR\_84

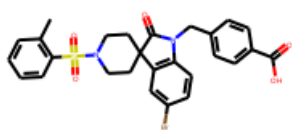

FXR\_85

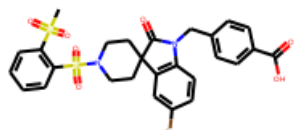

FXR\_86

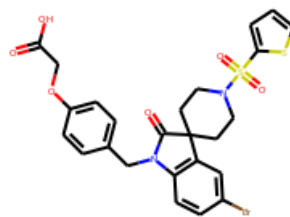

FXR\_87

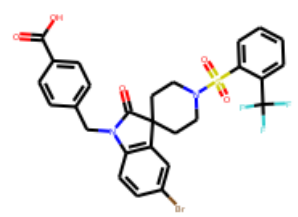

FXR\_88

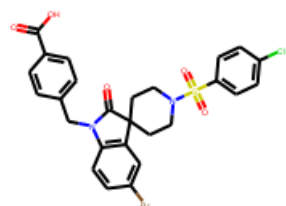

FXR\_89

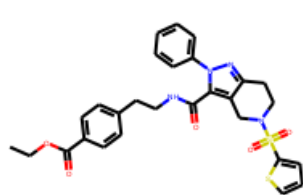

FXR\_90

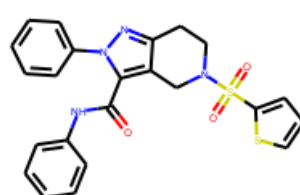

FXR\_91

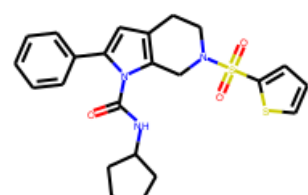

FXR\_92

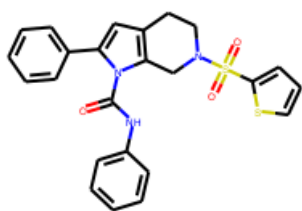

FXR\_93

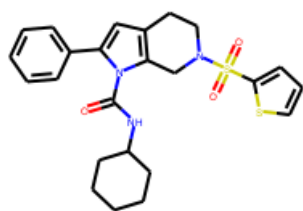

FXR\_94

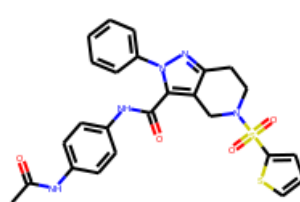

FXR\_95

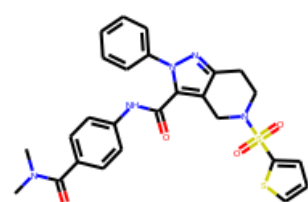

FXR\_96

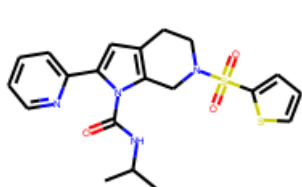

FXR\_97

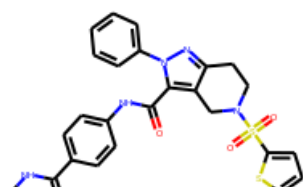

FXR\_98

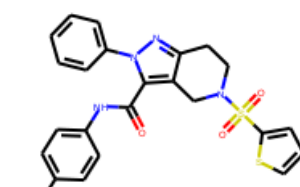

FXR\_99

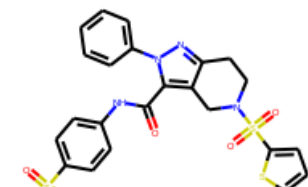

FXR\_100

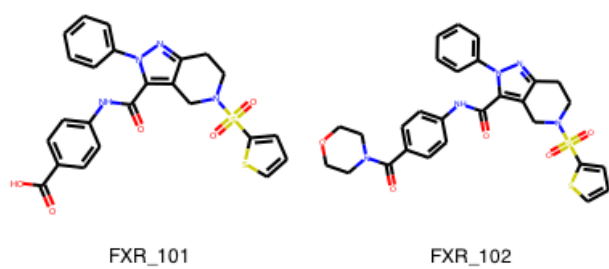

Figure 11: Inhibitor data set consisting of 102 ligands and their 2D structural representations and dataset ID.
